# Supplementary material for: ADNP is associated with immune infiltration and radiosensitivity in hepatocellular carcinoma for predicting the prognosis
Source: Springer Nature journal article supplement (doi:10.1186/s12920-023-01592-x), 2023-07-31
Supplement: MOESM1 [file 12920_2023_1592_MOESM1_ESM.pdf]

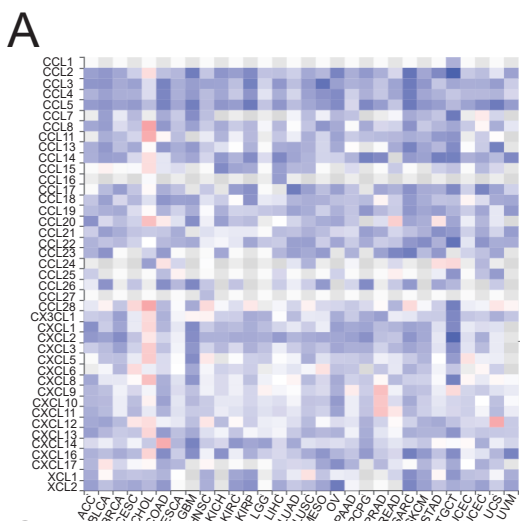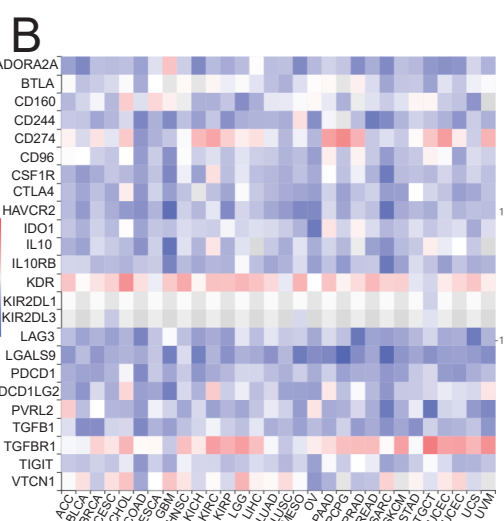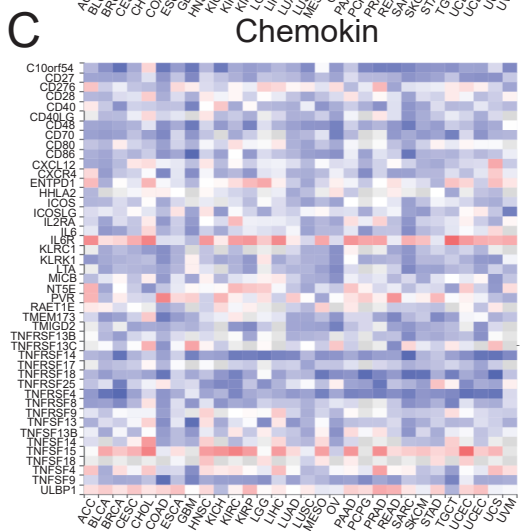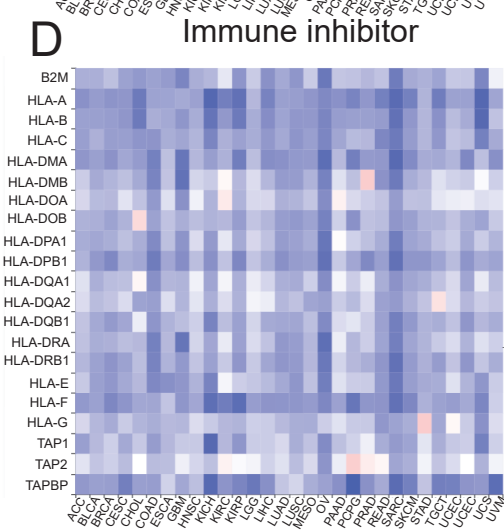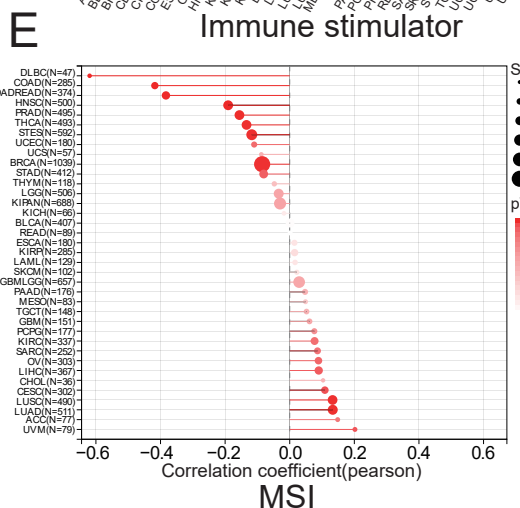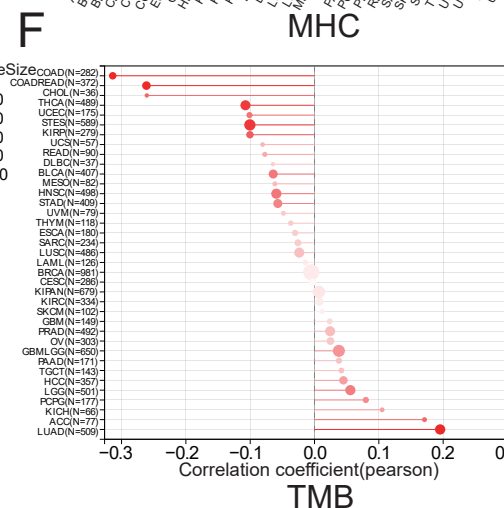

**Figure S1.** Correlations between ADNP, immune checkpoints and biomarkers. **(A-D)** The correlations between ADNP and chemokine, immune inhibitor, immune stimulator and MHC in multiple cancers. **(E, F)** The correlations between ADNP expression and TMB, MSI in cancers.
