# Supplementary material for: ADNP is associated with immune infiltration and radiosensitivity in hepatocellular carcinoma for predicting the prognosis
Source: Springer Nature journal article supplement (doi:10.1186/s12920-023-01592-x), 2023-07-31
Supplement: MOESM2 [file 12920_2023_1592_MOESM2_ESM.pdf]

Supplementary Table1 The relationship between ADNP expression and immune infiltration (Stromal score)

| Stromal score      | r value  | p value  |
|--------------------|----------|----------|
| TARGET-NB(N=153)   | -0.52367 | 3.76E-12 |
| TCGA-STES(N=569)   | -0.27363 | 3.14E-11 |
| TCGA-GBMLGG(N=656) | -0.23688 | 8.09E-10 |
| TCGA-LUSC(N=491)   | -0.27157 | 9.50E-10 |
| TCGA-GBM(N=152)    | -0.45974 | 2.55E-09 |
| TCGA-BLCA(N=405)   | -0.28284 | 6.91E-09 |
| TCGA-KIPAN(N=878)  | 0.176374 | 1.44E-07 |
| TCGA-SARC(N=258)   | -0.28864 | 2.42E-06 |
| TARGET-LAML(N=142) | -0.37573 | 4.07E-06 |
| TCGA-STAD(N=388)   | -0.2105  | 2.92E-05 |
| TARGET-WT(N=80)    | -0.43469 | 5.60E-05 |
| TCGA-KIRC(N=528)   | 0.169308 | 9.25E-05 |
| TCGA-SKCM-M(N=351) | -0.19689 | 2.06E-04 |
| TCGA-LGG(N=504)    | -0.1542  | 5.13E-04 |
| TCGA-LUAD(N=500)   | -0.1493  | 8.11E-04 |
| TCGA-KIRP(N=285)   | -0.18061 | 2.21E-03 |
| TCGA-SKCM(N=452)   | -0.14171 | 2.53E-03 |
| TCGA-PCPG(N=177)   | -0.22338 | 2.80E-03 |
| TCGA-THCA(N=503)   | -0.11923 | 7.43E-03 |
| TCGA-LAML(N=214)   | 0.179555 | 8.47E-03 |
| TCGA-CESC(N=291)   | -0.12589 | 3.18E-02 |
| TCGA-ACC(N=77)     | -0.24168 | 3.42E-02 |
| TCGA-UCEC(N=178)   | -0.15702 | 3.63E-02 |
| TCGA-BRCA(N=1077)  | -0.06343 | 3.74E-02 |
| TCGA-SKCM-P(N=101) | -0.19918 | 4.58E-02 |

Supplementary Table2 The relationship between ADNP expression and immune infiltration (Immune score)

| Immune score         | r value  | p value  |
|----------------------|----------|----------|
| TCGA-BRCA(N=1077)    | -0.27479 | 4.12E-20 |
| TCGA-SARC(N=258)     | -0.51984 | 2.91E-19 |
| TCGA-LUSC(N=491)     | -0.38316 | 1.28E-18 |
| TCGA-STES(N=569)     | -0.35615 | 1.86E-18 |
| TCGA-GBM(N=152)      | -0.52817 | 2.69E-12 |
| TCGA-OV(N=416)       | -0.33184 | 3.77E-12 |
| TCGA-GBMLGG(N=656)   | -0.25459 | 3.65E-11 |
| TCGA-SKCM-M(N=351)   | -0.34203 | 4.56E-11 |
| TCGA-THCA(N=503)     | -0.28526 | 7.14E-11 |
| TCGA-LUAD(N=500)     | -0.28337 | 1.10E-10 |
| TCGA-BLCA(N=405)     | -0.30886 | 2.12E-10 |
| TARGET-WT(N=80)      | -0.62826 | 4.42E-10 |
| TCGA-KIRP(N=285)     | -0.3466  | 1.82E-09 |
| TCGA-UCEC(N=178)     | -0.42182 | 4.52E-09 |
| TCGA-SKCM(N=452)     | -0.26628 | 8.94E-09 |
| TCGA-CESC(N=291)     | -0.32532 | 1.34E-08 |
| TCGA-STAD(N=388)     | -0.26004 | 2.04E-07 |
| TCGA-PCPG(N=177)     | -0.36595 | 5.47E-07 |
| TARGET-NB(N=153)     | -0.35939 | 5.06E-06 |
| TCGA-ESCA(N=181)     | -0.32785 | 6.62E-06 |
| TCGA-THYM(N=118)     | -0.39609 | 9.00E-06 |
| TARGET-LAML(N=142)   | -0.32431 | 8.24E-05 |
| TCGA-ACC(N=77)       | -0.41852 | 1.52E-04 |
| TCGA-LGG(N=504)      | -0.16456 | 2.07E-04 |
| TCGA-TGCT(N=132)     | -0.30554 | 3.67E-04 |
| TARGET-ALL(N=86)     | -0.36371 | 5.77E-04 |
| TCGA-SKCM-P(N=101)   | -0.32697 | 8.46E-04 |
| TCGA-MESO(N=85)      | -0.34223 | 1.35E-03 |
| TCGA-COADREAD(N=373) | -0.16237 | 1.65E-03 |
| TCGA-COAD(N=282)     | -0.18051 | 2.34E-03 |
| TCGA-PRAD(N=495)     | -0.13324 | 2.98E-03 |
| TCGA-UCS(N=56)       | -0.37654 | 4.23E-03 |
| TCGA-LIHC(N=363)     | -0.14283 | 6.41E-03 |
| TCGA-KIRC(N=528)     | -0.11202 | 1.00E-02 |
| TCGA-LAML(N=214)     | -0.16754 | 1.41E-02 |
| TARGET-ALL-R(N=99)   | -0.22559 | 2.48E-02 |
| TCGA-HNSC(N=517)     | -0.096   | 2.91E-02 |

Supplementary Table3 The relationship between ADNP expression and immune infiltration (Estimate score)

| Estimate Score     | r value  | p value  |
|--------------------|----------|----------|
| TCGA-STES (N=569)  | -0.34103 | 5.80E-17 |
| TCGA-LUSC(N=491)   | -0.35077 | 1.16E-15 |
| TCGA-SARC(N=258)   | -0.46123 | 5.38E-15 |
| TCGA-GBM(N=152)    | -0.51808 | 8.16E-12 |
| TCGA-BRCA(N=1077)  | -0.2042  | 1.33E-11 |
| TCGA-GBMLGG(N=656) | -0.2538  | 4.22E-11 |
| TCGA-BLCA(N=405)   | -0.31586 | 7.81E-11 |
| TARGET-NB(N=153)   | -0.46627 | 1.25E-09 |
| TCGA-SKCM-M(N=351) | -0.31013 | 2.91E-09 |
| TARGET-WT(N=80)    | -0.57736 | 2.07E-08 |
| TCGA-LUAD(N=500)   | -0.2391  | 6.25E-08 |
| TCGA-THCA(N=503)   | -0.23702 | 7.48E-08 |
| TCGA-STAD(N=388)   | -0.25761 | 2.68E-07 |
| TCGA-KIRP(N=285)   | -0.29681 | 3.32E-07 |
| TCGA-SKCM(N=452)   | -0.23669 | 3.57E-07 |
| TCGA-UCEC(N=178)   | -0.34918 | 1.78E-06 |
| TCGA-OV(N=416)     | -0.2291  | 2.34E-06 |
| TCGA-CESC(N=291)   | -0.27109 | 2.70E-06 |
| TARGET-LAML(N=142) | -0.36637 | 7.32E-06 |
| TCGA-PCPG(N=177)   | -0.31028 | 2.63E-05 |
| TCGA-LGG(N=504)    | -0.16518 | 1.96E-04 |
| TCGA-TGCT(N=132)   | -0.30874 | 3.16E-04 |
| TCGA-ESCA(N=181)   | -0.25444 | 5.47E-04 |
| TCGA-ACC(N=77)     | -0.35913 | 1.34E-03 |
| TCGA-SKCM-P(N=101) | -0.30499 | 1.93E-03 |
| TCGA-THYM(N=118)   | -0.27552 | 2.53E-03 |
| TARGET-ALL(N=86)   | -0.30857 | 3.85E-03 |
| TCGA-MESO(N=85)    | -0.27653 | 1.04E-02 |
| TCGA-LIHC(N=363)   | -0.13081 | 1.26E-02 |
| TARGET-ALL-R(N=99) | -0.22238 | 2.69E-02 |
| TCGA-PRAD(N=495)   | -0.08888 | 4.81E-02 |
